# Supplementary material
Source: PubMed Central journal article supplement (PMC3361909)
Supplement: NIHMS375516-supplement-01.pdf [file NIHMS375516-supplement-01.pdf]

## Supplemental Information

### IRS2 Signaling in LepR-b Neurons

### Suppresses FoxO1 to Control Energy Balance

### Independently of Leptin Action

Marianna Sadagurski, Rebecca L. Leshan, Christa Patterson, Aldo Rozzo, Alexandra Kuznetsova, Josh Skorupski, Justin C. Jones, Ronald A. Depinho, Martin G. Myers, Jr., and Morris F. White

### Supplemental Experimental Procedures

**In situ hybridization:** Mice were perfused with room temperature 4% formaldehyde in PBS. Brain samples were postfixed in 4% formaldehyde in PBS for 18–24 h at 4°C, dehydrated, and embedded in paraffin. Brain sections (5 µm in thickness) were subjected to *in situ* hybridization (ISH) by using RNAscope (Advanced Cell Diagnostics) following the manufacturer's protocol.

**Western Blotting:** Mouse whole brain, hypothalamus, liver, muscle, islets, WAT and BAT were removed, homogenized and applied for direct immunoblotting (50 µg) as described previously (Dong et al., 2008). To assess the expression levels of *Irs2*, rabbit polyclonal IRS2 antibody (Upstate Biotechnology Inc. NY, USA; now known as EMD Millipore) was used. *Irs2* expression was quantified by densitometry and levels were normalized to β-actin levels for presentation.

**Islet morphology and immunohistochemistry:** For immunohistochemistry, pancreatic sections were fixed for 16 hours in 4% paraformaldehyde and then transferred to PBS until embedding in paraffin as previously described (Lin et al., 2004). Following rehydration and permeabilization with 1% Triton X-100, sections were incubated overnight at 4°C with guinea pig anti-insulin (Zymed Laboratories Inc.). Alexa-Flour (Invitrogen) secondary antibodies were used. Mounting media included 4',6'-diamino-2-phenylindole (DAPI) to stain nuclei (ProLong Gold; Invitrogen). For quantification of β cell area, we analyzed 4-5 pancreata per using 4 sections at least 150 µm apart from each other. For each section, the total area occupied by insulin-positive cells was analyzed using Spot Imaging Solutions, Ver 5.0, advanced. Results are expressed as the percentage of the total pancreatic area. Hematoxylin and eosin (H&E) staining was performed using paraffin embedded pancreatic tissue sections as previously described (Norquay et al., 2009).

**Microdissection and PCR analysis:** Mice were weighed just prior to euthanasia, after which brains were microdissected to obtain the ARC, VMH, PVN, NTS and LHA which were snap frozen and stored at –80°C as previously described (Leininger et al., 2009). To detect Cre-mediated recombination at the genomic DNA levels of various tissues by PCR, we utilized primers for the floxed *Irs2* and for the *Irs2* coding region as

previously described (Hennige et al., 2003). For the analysis of *Irs2* and *Socs3* mRNA expression, RNA was extracted as described in the main text, and analyzed using quantitative real-time PCR with customized primers. Actin gene expression was used to normalize RNA content and the relative gene product amounts were reported as mean  $\pm$ SEM of several animals. Data were analyzed by the  $2^{-\Delta\Delta C_t}$  method.

**Endocrine profile:** Mouse trunk blood was collected from 3-month-old mice and assayed for hormone levels. Serum corticosterone levels were measured by EIA (Arbor Assays) from fasted mice. Serum thyroxine (T4) was measured according to the manufacturer's instructions (Siemens).

**Fertility assessment:** Female mice for study were housed individually from the time of weaning at 21 days old. Beginning at 28 days of age female mice were monitored daily for vaginal opening and then for vaginal estrus by cellular histology through three cycles, or until 10 weeks old as previously described (Holzenberger et al., 2003). All data were collected between 14:00 and 16:00. Mating success rates were determined by pairing experimental mice with unrelated control mice (known to be fertile) for 2 months or until a litter was produced. Pairs were monitored regularly for signs of visible pregnancy.

A (*Irs2* *in situ* hybridization)

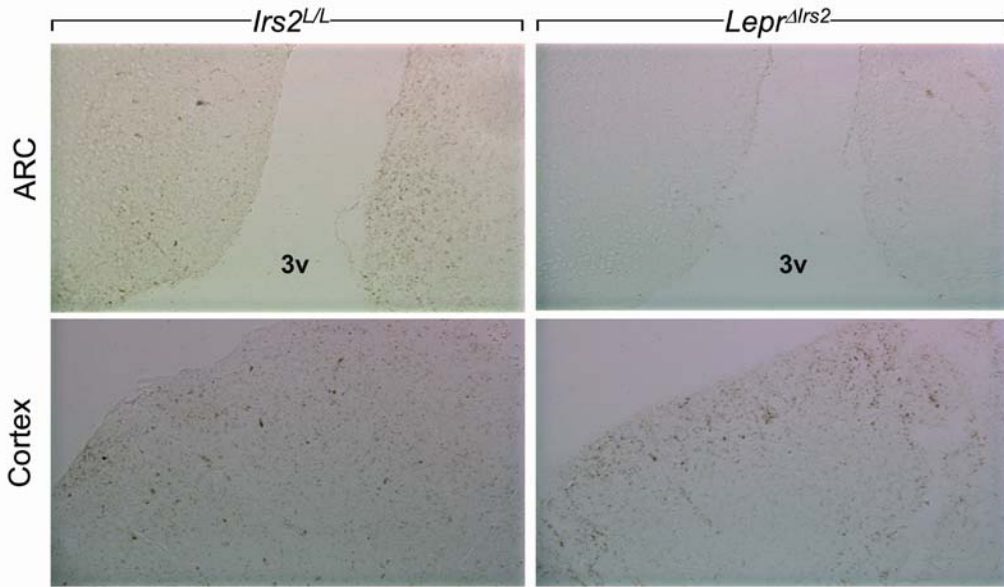

B

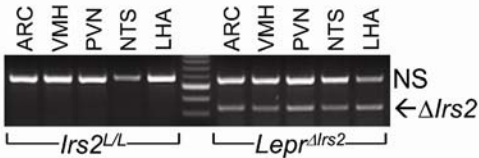

C

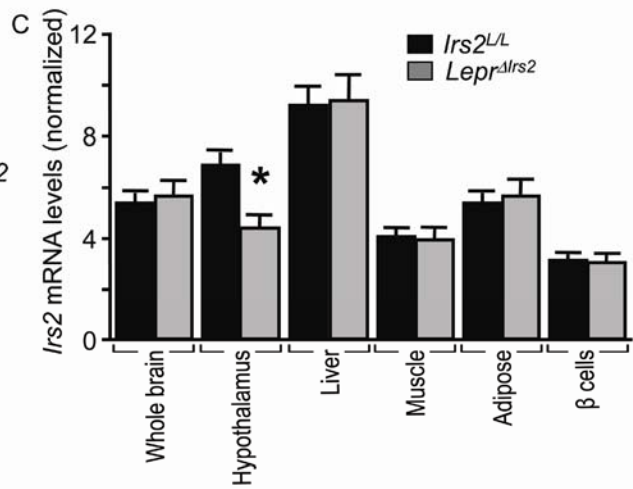

D (*Irs2* immunoblotting)

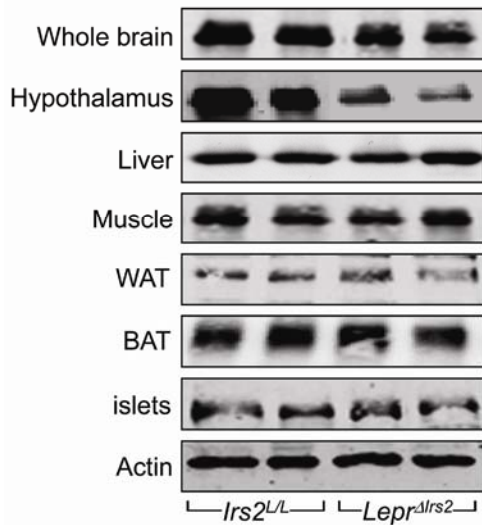

E

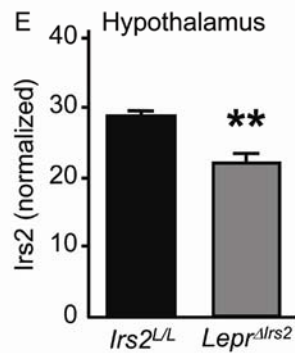

**Figure S1. Related to Figure 1.** (A) Representative images from *in situ* hybridization for *Irs2* (brown) in ARC and cortex from control and *Lepr*<sup>ΔIrs2</sup> mice. 3v= 3<sup>rd</sup> cerebral

ventricle. (B) PCR analysis of genomic DNA from microdissected brain areas of control and *Lepr* <sup>$\Delta$ Irs2</sup> mice to detect intact *Irs2*<sup>L</sup> and *Irs2*<sup>d</sup> (following cre-mediated recombination). (C) *Irs2* mRNA expression in the indicated tissues of control and *Lepr* <sup>$\Delta$ Irs2</sup> mice. The mRNA levels were normalized to  $\beta$ -actin and are expressed as a unitless ratio of *Irs2*/ $\beta$ -actin. (D) Western blot analysis of *Irs2* in the indicated tissues of control and *Lepr* <sup>$\Delta$ Irs2</sup> mice. (E) Quantification of *Irs2* protein expression in hypothalamus (as in (D)), normalized to  $\beta$ -actin (n=4/genotype). Data are presented as a unitless ratio of *Irs2* density/ $\beta$ -actin density (mean  $\pm$  SEM), \*\*, p< 0.01.

(6 wks)

*Irs2*<sup>L/L</sup> (BAT)

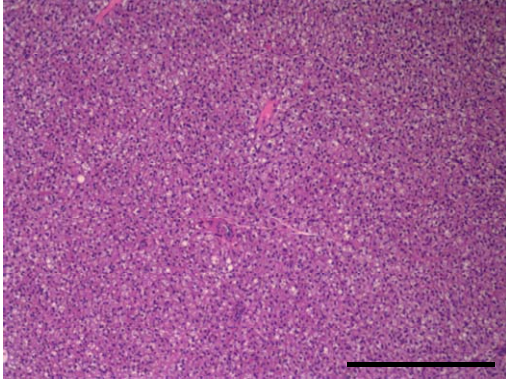

*Lep<sup>r</sup>* <sup>$\Delta$ Irs2</sup> (BAT)

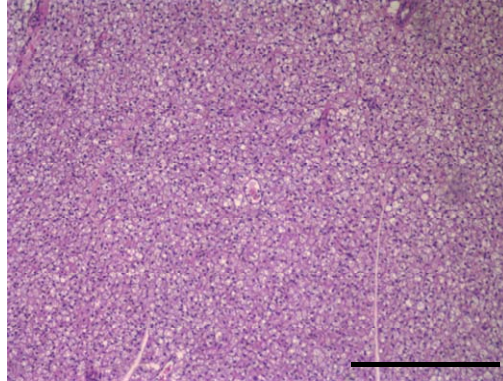

**Figure S2. Related to Figure 2.** Representative H&E staining of brown adipose tissue (BAT) of *Irs2*<sup>L/L</sup> (left panel) and *Lep<sup>r</sup>* <sup>$\Delta$ Irs2</sup> mice (right panel) aged 6 weeks. Scale bar: 500  $\mu$ m.

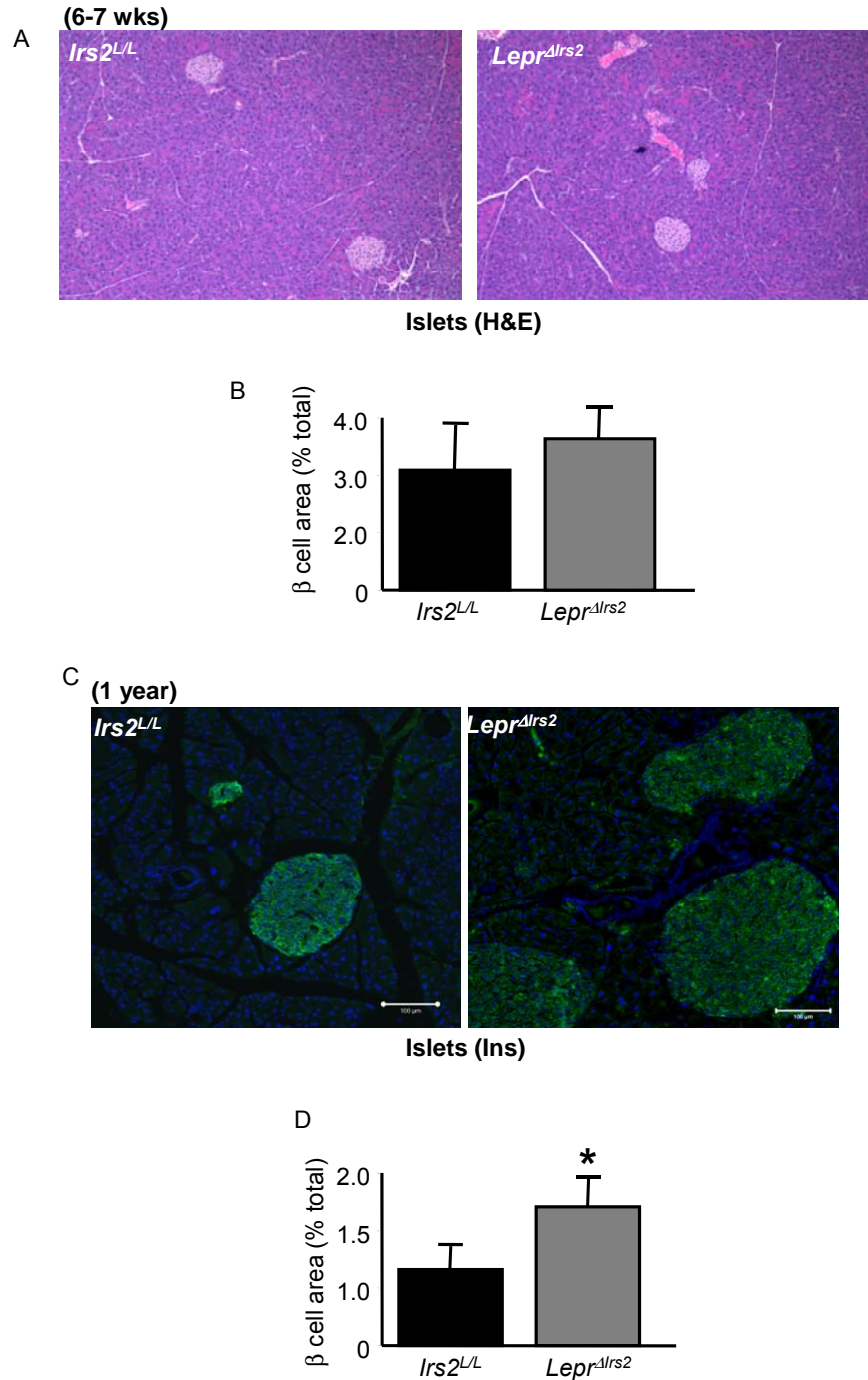

**Figure S3. Related to Figure 3.** (A) Representative H&E staining of pancreatic islets of *Irs2<sup>L/L</sup>* and *Lepr<sup>ΔIrs2</sup>* mice aged 6-7 weeks. (B) The percentage of the total pancreatic area occupied by  $\beta$  cells in 6-7 weeks old male mice of the indicated genotypes. (C) Immunofluorescence staining for insulin (green) in islets from 1-year-old mice (DNA staining- DAPI, blue). Scale bar: 100  $\mu$ m. (D) The percentage of the total pancreatic area occupied by  $\beta$  cells in 1-year-old male mice of the indicated genotypes (n=4-5/genotype). Data in (B, D) are presented as mean  $\pm$  SEM; \*, p< 0.05.

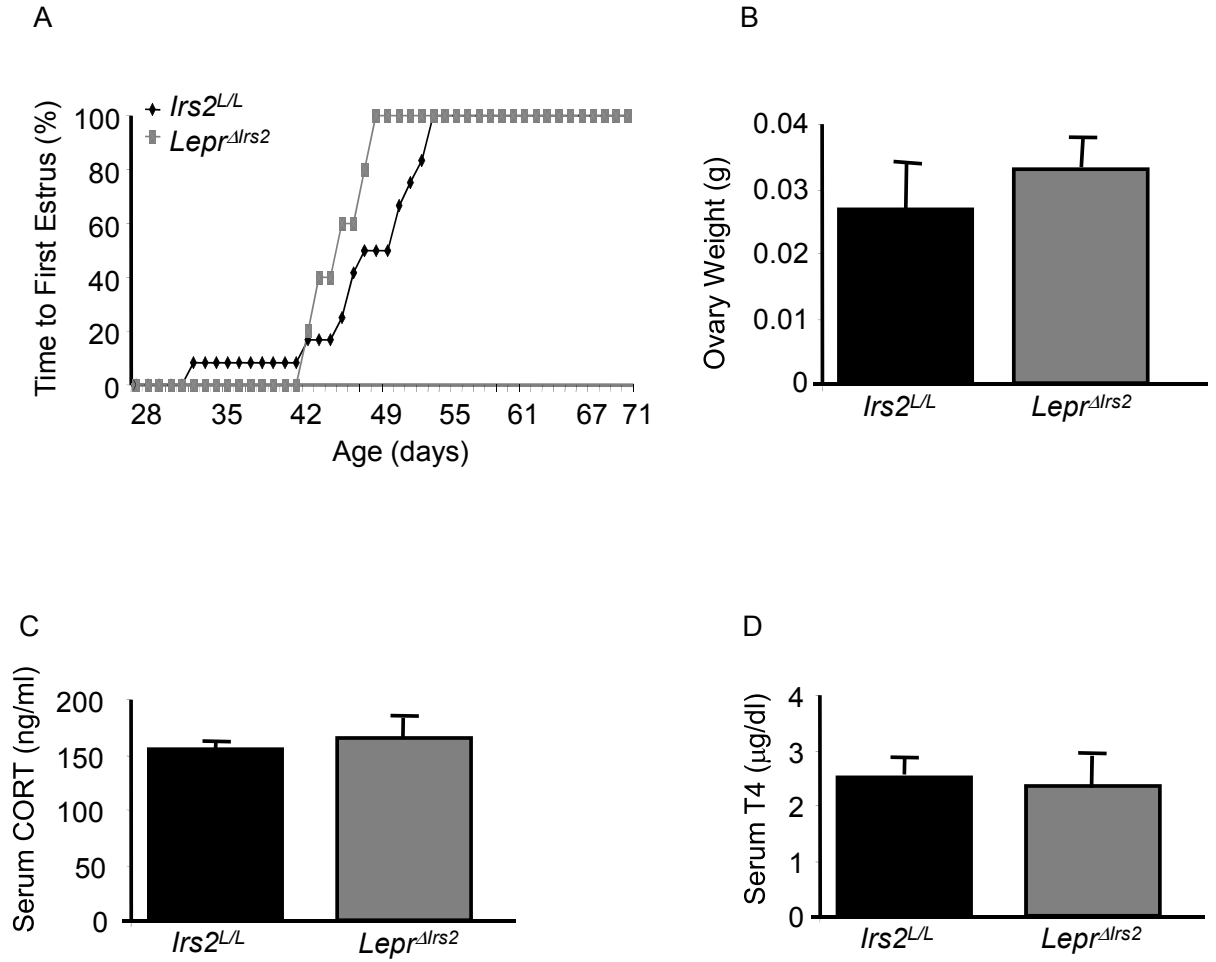

**Figure S4. Related to Figure 3.** (A) Onset of estrus in female mice of the indicated genotypes. (B) Ovarian weight of female mice of the indicated genotypes (10 weeks of age, n=8-12) (C) Fasting CORT levels in male mice of the indicated genotypes at 8 weeks (n=4/ genotype). (D) Serum T4 levels in male mice of the indicated genotypes at 12 weeks of age (n=6/genotype). Data are presented as mean  $\pm$  SEM; \*, p<0.05.

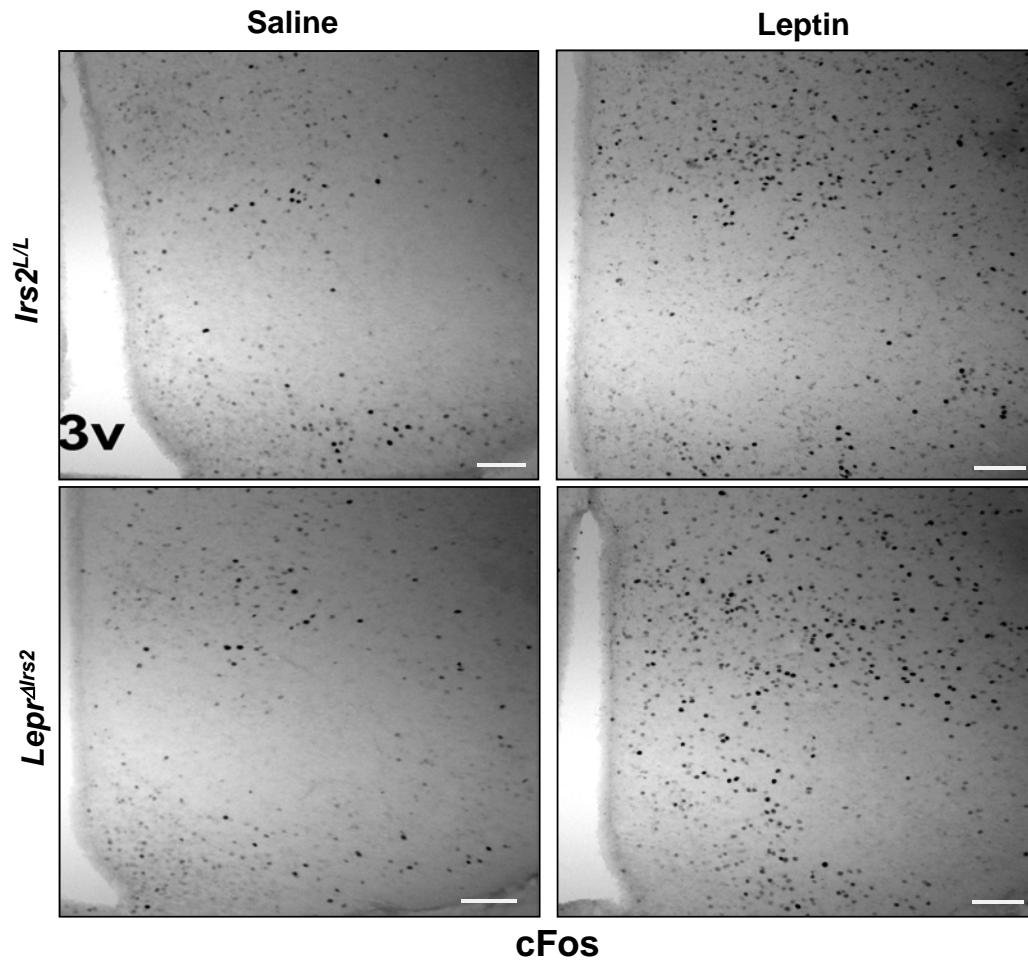

**Figure S5. Related to Figure 4.** Representative images of cFos-immunoreactivity in the hypothalamus of 6-week-old mice of the indicated genotypes following treatment with vehicle or leptin (5 mg/kg, i.p., 2 hours). 3v- 3<sup>rd</sup> cerebral ventricle. Scale bar: 100 $\mu$ m



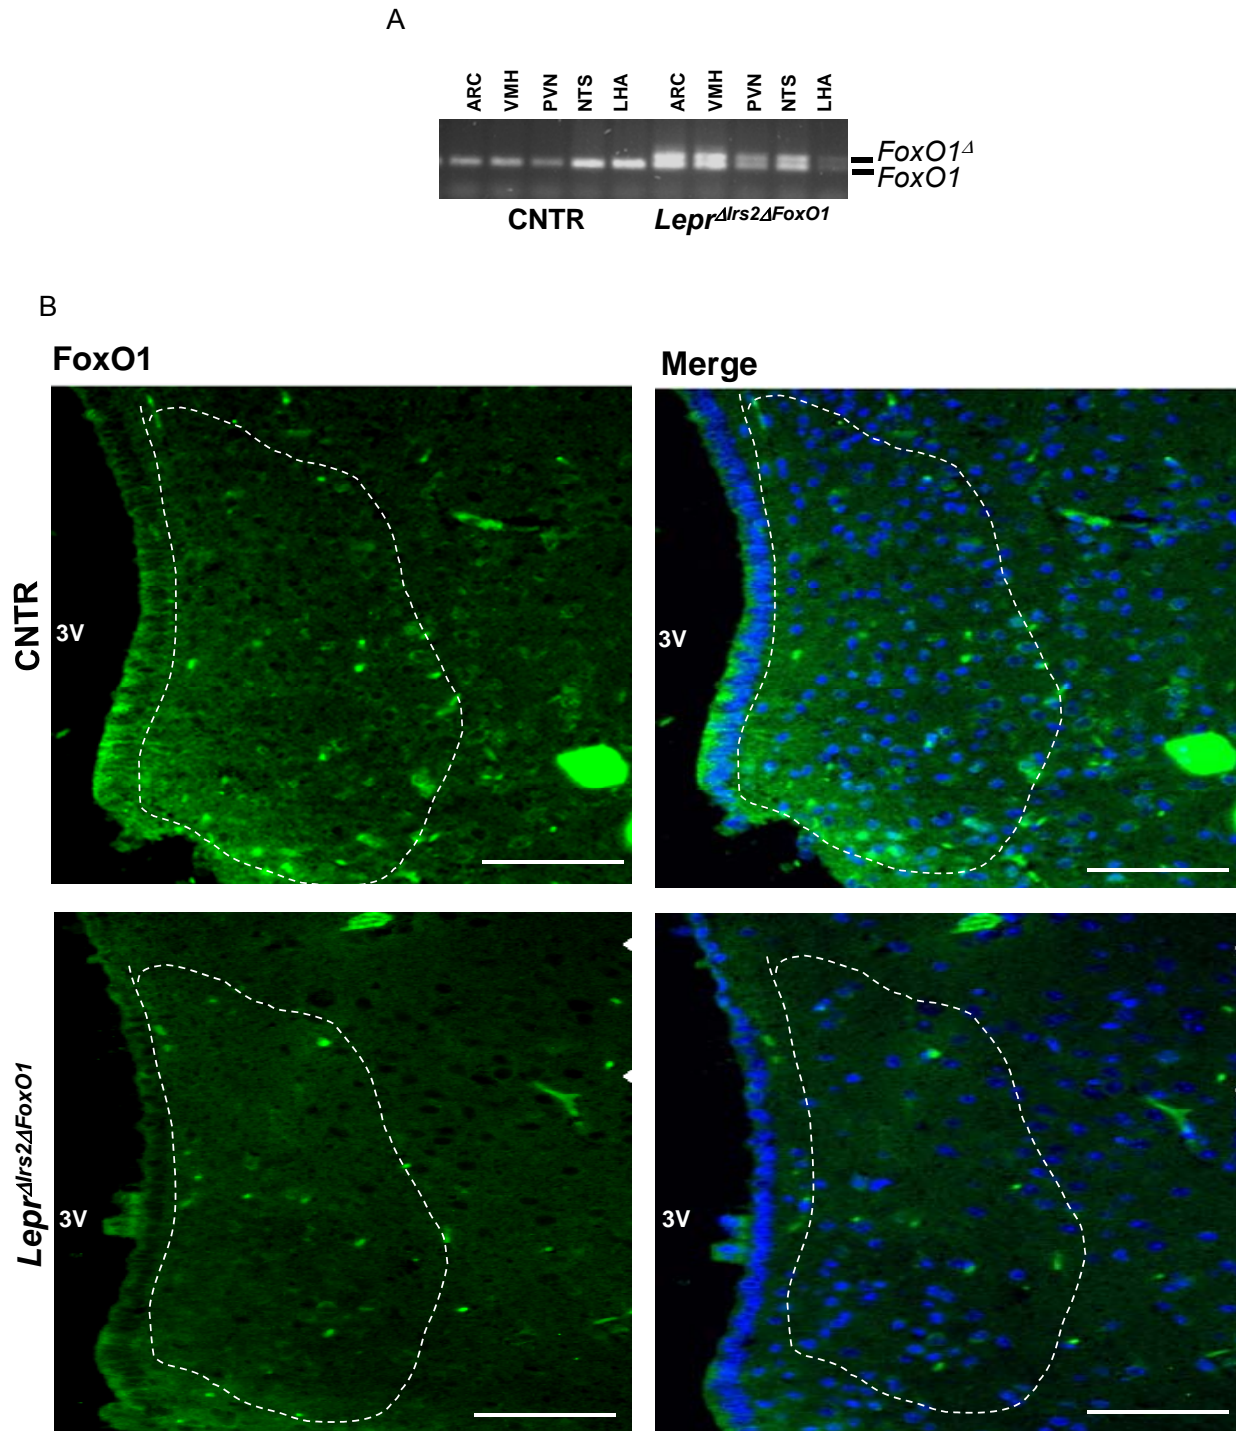

**Figure S6. Related to Figure 6.** (A) PCR analysis of genomic DNA from microdissected brain tissue of control (CNTR) and *Lepr*<sup>ΔIrs2ΔFoxO1</sup> mice to detect intact *Foxo1*<sup>L</sup> and *Foxo1*<sup>Δ</sup> (following cre-mediated recombination) in the indicated brain regions. (B) Representative images of immunofluorescent detection of FoxO1 in the ARC of 12-week-old CNTR and *Lepr*<sup>ΔIrs2ΔFoxO1</sup> mice. Green: FoxO1, blue: DAPI (DNA labeling). Scale bar: 100μm. 3v= 3<sup>rd</sup> cerebral ventricle

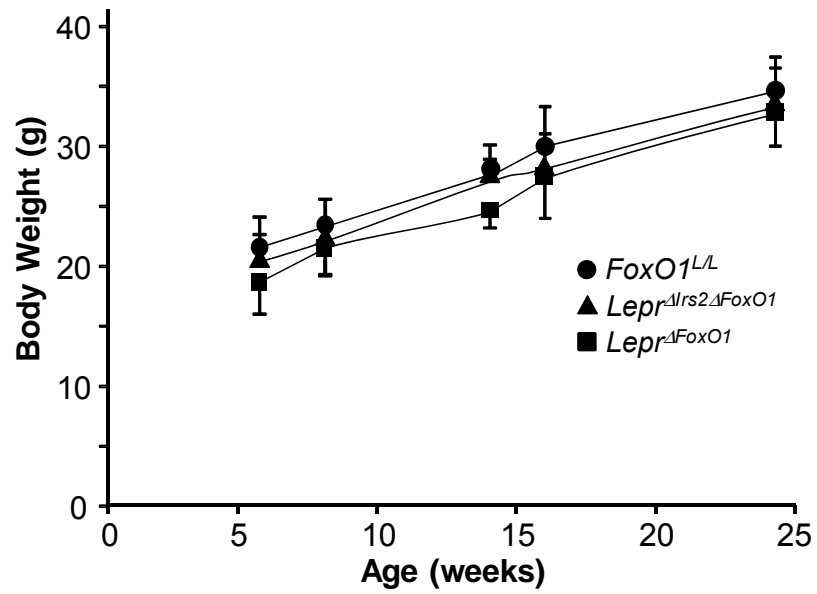

**Figure S7. Related to Figure 6.** Body weight of chow-fed male mice of the indicated genotypes. Data are presented as mean  $\pm$  SEM at the indicated time intervals; p=NS at all ages.

**Table S1. Fertility Assessment in Control and *Lepr* <sup>$\Delta$ rs2</sup> Mice, Related to Figure 3**

| <b>Cross</b>                                                                                              | <b>No. sets</b> | <b>No. litters</b> | <b>No. offspring per litter</b> |
|-----------------------------------------------------------------------------------------------------------|-----------------|--------------------|---------------------------------|
| Male control X female control                                                                             | 3               | 3                  | 8.8±0.6                         |
| Male control X female <i>Lepr</i> <sup><math>\Delta</math>rs2</sup>                                       | 3               | 3                  | 9.1±0.9                         |
| Male <i>Lepr</i> <sup><math>\Delta</math>rs2</sup> X female control                                       | 3               | 3                  | 10.5±0.5                        |
| Male <i>Lepr</i> <sup><math>\Delta</math>rs2</sup> X female <i>Lepr</i> <sup><math>\Delta</math>rs2</sup> | 3               | 3                  | 9.2±1.3                         |

## Supplemental References

Dong,X.C., Copps,K.D., Guo,S., Li,Y., Kollipara,R., DePinho,R.A., and White,M.F. (2008). Inactivation of hepatic Foxo1 by insulin signaling is required for adaptive nutrient homeostasis and endocrine growth regulation. *Cell Metab* 8, 65-76.

Hennige,A.M., Burks,D.J., Ozcan,U., Kulkarni,R.N., Ye,J., Park,S., Schubert,M., Fisher,T.L., Dow,M.A., Leshan,R., Zakaria,M., Mossa-Basha,M., and White,M.F. (2003). Upregulation of insulin receptor substrate-2 in pancreatic beta cells prevents diabetes. *J. Clin. Invest* 112, 1521-1532.

Holzenberger,M., Dupont,J., Ducos,B., Leneuve,P., Geloën,A., Even,P.C., Cervera,P., and Le,B.Y. (2003). IGF-1 receptor regulates lifespan and resistance to oxidative stress in mice. *Nature* 421, 182-187.

Leinninger,G.M., Jo,Y.H., Leshan,R.L., Louis,G.W., Yang,H., Barrera,J.G., Wilson,H., Opland,D.M., Faouzi,M.A., Gong,Y., Jones,J.C., Rhodes,C.J., Chua S Jr, Diano,S., Horvath,T.L., Seeley,R.J., Becker,J.B., Munzberg,H., and Myers,M.G., Jr. (2009). Leptin acts via leptin receptor-expressing lateral hypothalamic neurons to modulate the mesolimbic dopamine system and suppress feeding. *Cell Metab* 10, 89-98.

Lin,X., Taguchi,A., Park,S., Kushner,J.A., Li,F., Li,Y., and White,M.F. (2004). Dysregulation of insulin receptor substrate 2 in beta cells and brain causes obesity and diabetes. *Journal of Clinical Investigation* 114, 908-916.

Norquay,L.D., D'Aquino,K.E., Opare-Addo,L.M., Kuznetsova,A., Haas,M., Bluestone,J.A., and White,M.F. (2009). Insulin receptor substrate-2 in beta-cells decreases diabetes in nonobese diabetic mice. *Endocrinology* 150, 4531-4540.
